# Supplementary material for: Tissue Culture-Induced Novel Epialleles of aMybTranscription Factor Encoded bypericarp color1in Maize
Source: Oxford University Press journal article supplement (doi:10.1534/genetics.110.117929), 2010-09-08
Supplement: tables1.pdf [file tables1.pdf]

**TABLE S1****Details of three regions analyzed through genomic bisulfite sequencing**

| Region | Coordinates<br>(Size)    | Target<br>strand | Primers used for amplification                                                               |
|--------|--------------------------|------------------|----------------------------------------------------------------------------------------------|
| R-I    | -169 to 157<br>(326-bp)  | Sense            | Forward-Prom: 5'-AGTAAAGGGTTTAAAATTGT-3'<br>Reverse-Prom: 5'-AAATCACACTACTACTTA-3'           |
| R-II   | 4093 to 3800<br>(294-bp) | Antisense        | Forward-SalI: 5'-AGATGGTAGAAATAAAGTTTGAGT-3'<br>Reverse-SalI: 5'-CATAACCTTACTTTACCCACATTA-3' |
| R-III  | 4781 to 4532<br>(250-bp) | Antisense        | Forward-Hpa: 5'-GGGAAATTATTAGGGAGGG-3'<br>Reverse-Hpa: 5'-CTCTTCATTCAAACCTAACTAA-3'          |
